# Supplementary material
Source: PubMed Central journal article supplement (PMC7723305)
Supplement: NIHMS1599181-supplement-supporting_material.pdf [file NIHMS1599181-supplement-supporting_material.pdf]

## Metadata standard and data exchange specifications to describe, model and integrate complex and diverse high-throughput screening data from the Library of Integrated Network-based Cellular Signatures (LINCS)

Uma D. Vempati<sup>1</sup>, Caty Chung<sup>1</sup>, Chris Mader<sup>1</sup>, Amar Koleti<sup>1</sup>, Nakul Datar<sup>1</sup>, Dušica Vidović<sup>1</sup>, David Wrobel<sup>2</sup>, Sean Erickson<sup>2</sup>, Jeremy Muhlich<sup>3</sup>, Gabriel Berriz<sup>3</sup>, Cyril Benes<sup>4</sup>, Aravind Subramanian<sup>5</sup>, Ajay Pillai<sup>6</sup>, Caroline E. Shamu<sup>2,3</sup>, Stephan C. Schürer<sup>\*,1,7</sup>

<sup>1</sup>Center for Computational Science, University of Miami, Miami, FL; <sup>2</sup>ICCB-Longwood Screening Facility, Harvard Medical School Boston MA; <sup>3</sup>Dept. of Systems Biology, Harvard Medical School, Boston MA; <sup>4</sup>Center for Molecular Therapeutics, Massachusetts General Hospital, Boston MA; <sup>5</sup>Broad Institute, Cambridge, MA; <sup>6</sup>National Human Genome Research Institute, National Institutes of Health, Rockville, MD; <sup>7</sup>Department of Molecular and Cellular Pharmacology, University of Miami, Miami, FL.

\*corresponding author, contact: [sschurer@med.miami.edu](mailto:sschurer@med.miami.edu)

### Supporting information

#### (I) Supporting Tables S1 to S5

**Table S1.** Sources of annotations and controlled vocabularies used in LINCS reagent metadata standards.

| Metadata category / descriptor | Annotation source / controlled vocabulary         | Reference URL                                                                                                                                                                                                               |
|--------------------------------|---------------------------------------------------|-----------------------------------------------------------------------------------------------------------------------------------------------------------------------------------------------------------------------------|
| Cell Line                      | Cell Line Ontology (CLO)                          | <a href="http://www.clo-ontology.org">http://www.clo-ontology.org</a>                                                                                                                                                       |
| Cell line mutation             | Catalogue Of Somatic Mutations In Cancer (COSMIC) | <a href="http://cancer.sanger.ac.uk/cancergenome/projects/cosmic">http://cancer.sanger.ac.uk/cancergenome/projects/cosmic</a>                                                                                               |
| Cell type                      | Cell type Ontology (CL)                           | <a href="http://cellontology.org">http://cellontology.org</a>                                                                                                                                                               |
| Organism                       | NCBI Taxonomy                                     | <a href="http://www.ncbi.nlm.nih.gov/taxonomy">http://www.ncbi.nlm.nih.gov/taxonomy</a>                                                                                                                                     |
| Organ and tissue               | Uber Anatomy Ontology (UBERON)                    | <a href="http://uberon.org">http://uberon.org</a>                                                                                                                                                                           |
| Gene                           | NCBI Gene, HUGO                                   | <a href="http://www.ncbi.nlm.nih.gov/gene">http://www.ncbi.nlm.nih.gov/gene</a> ,<br><a href="http://www.genenames.org">http://www.genenames.org</a>                                                                        |
| Protein                        | UniProt                                           | <a href="http://www.uniprot.org">http://www.uniprot.org</a>                                                                                                                                                                 |
| siRNA / shRNA                  | NCBI Probe                                        | <a href="http://www.ncbi.nlm.nih.gov/probe">http://www.ncbi.nlm.nih.gov/probe</a>                                                                                                                                           |
| Small molecule                 | PubChem, DrugBank, ChEBI, and others              | <a href="http://pubchem.ncbi.nlm.nih.gov">http://pubchem.ncbi.nlm.nih.gov</a> ,<br><a href="http://www.drugbank.ca/">http://www.drugbank.ca/</a> ,<br><a href="http://www.ebi.ac.uk/chebi/">http://www.ebi.ac.uk/chebi/</a> |
| Antibody                       | NIF antibody registry                             | <a href="http://antibodyregistry.org/">http://antibodyregistry.org/</a>                                                                                                                                                     |
| Disease                        | Human Disease Ontology (DOID)                     | <a href="http://bioportal.bioontology.org/ontologies/1009">http://bioportal.bioontology.org/ontologies/1009</a>                                                                                                             |
| Biological process             | Gene Ontology (GO)                                | <a href="http://www.geneontology.org/">http://www.geneontology.org/</a>                                                                                                                                                     |

**Table S2.** Excerpt of annotation of cell lines from LINCS assays with the metadata standards and corresponding terminology.

| Cell Name    | Alternate Name         | Alternate ID                                 | Provider | Provider Catalog ID | Organism     | Organ    | Cell type  | Disease term                  | DOID  | Growth properties | Organism gender |
|--------------|------------------------|----------------------------------------------|----------|---------------------|--------------|----------|------------|-------------------------------|-------|-------------------|-----------------|
| MCF7         |                        | MGH:403;<br>COSMIC:905946                    | ATCC     | HTB-22              | Homo sapiens | breast   | epithelial | breast fibrocystic disease    | 3458  | adherent          | female          |
| MCF 10A      | MCF10A                 |                                              | ATCC     | CRL-10317           | Homo sapiens | breast   | epithelial | breast adenocarcinoma         | 10354 | adherent          | female          |
| SK-BR-3      | SKBr3                  |                                              | ATCC     | HTB-30              | Homo sapiens | breast   | epithelial | breast adenocarcinoma         | 3458  | adherent          | female          |
| MDA-MB-231   | MDAMB231;<br>MDA-MB231 | COSMIC:905960                                | ATCC     | HTB-26              | Homo sapiens | breast   | epithelial | breast carcinoma              | 3458  | adherent          | female          |
| BT-20        |                        | MGH:408;<br>COSMIC:906801                    | ATCC     | HTB-19              | Homo sapiens | breast   |            | prostate adenocarcinoma       | 3459  | adherent          | female          |
| PC-3 [JPC-3] | PC3                    | ATCC:CRL-1435;<br>MGH:877;<br>COSMIC:1240202 | JHSF     | JCRB0077            | Homo sapiens | lung     |            | non-small cell lung carcinoma | 2526  | adherent          | female          |
| A549         |                        | MGH:677;<br>COSMIC:905949                    | ATCC     | CCL-185             | Homo sapiens | lung     |            | skin melanoma                 | 3908  | adherent          | male            |
| A-375        | A375                   | COSMIC:906793                                | ATCC     | CRL-1619            | Homo sapiens | skin     | epithelial | hepatocellular carcinoma      | 8923  | adherent          | female          |
| Hep G2       | HEPG2                  | MGH:650                                      | ATCC     | HB-8065             | Homo sapiens | liver    | epithelial | prostate cancer               | 684   | adherent          | male            |
| Vcap         | VCaP                   |                                              | ATCC     | CRL-2876            |              | prostate | epithelial | non-small cell lung carcinoma | 10283 | adherent          | male            |

**Table S3.** Example annotation of LINCS protein reagents using proposed metadata standards.

| Protein (by gene symbol) | Phosphorylation status | Mutation | UniProt accession | Alternate names                                                                                                                                            |
|--------------------------|------------------------|----------|-------------------|------------------------------------------------------------------------------------------------------------------------------------------------------------|
| AAK1                     |                        |          | Q2M2I8            | AP2 associated kinase 1; AAK1; DKFZp686F03202; DKFZp686K16132; FLJ23712; FLJ25931; FLJ31060; FLJ42882; FLJ45252; KIAA1048; MGC138170; MGC164568; MGC164570 |
| ABL1                     |                        |          | P00519            | c-abl oncogene 1, receptor tyrosine kinase; ABL; ABL1; bcr/abl; c-ABL; JTK7; p150; v-abl                                                                   |
| ABL1                     |                        | E25K     | P00519            | c-abl oncogene 1, receptor tyrosine kinase; ABL; ABL1; bcr/abl; c-ABL; JTK7; p150; v-abl                                                                   |
| ABL1                     | Phosphorylated         | E25K     | P00519            | c-abl oncogene 1, receptor tyrosine kinase; ABL; ABL1; bcr/abl; c-ABL; JTK7; p150; v-abl                                                                   |
| ABL1                     |                        | F317I    | P00519            | c-abl oncogene 1, receptor tyrosine kinase; ABL; ABL1; bcr/abl; c-ABL; JTK7; p150; v-abl                                                                   |
| ABL1                     | Nonphosphorylated      | F317I    | P00519            | c-abl oncogene 1, receptor tyrosine kinase; ABL; ABL1; bcr/abl; c-ABL; JTK7; p150; v-abl                                                                   |
| ABL1                     | Phosphorylated         | F317I    | P00519            | c-abl oncogene 1, receptor tyrosine kinase; ABL; ABL1; bcr/abl; c-ABL; JTK7; p150; v-abl                                                                   |
| ABL1                     |                        | F317L    | P00519            | c-abl oncogene 1, receptor tyrosine kinase; ABL; ABL1; bcr/abl; c-ABL; JTK7; p150; v-abl                                                                   |
| ABL1                     | Nonphosphorylated      | F317L    | P00519            | c-abl oncogene 1, receptor tyrosine kinase; ABL; ABL1; bcr/abl; c-ABL; JTK7; p150; v-abl                                                                   |
| ABL1                     | Phosphorylated         | F317L    | P00519            | c-abl oncogene 1, receptor tyrosine kinase; ABL; ABL1; bcr/abl; c-ABL; JTK7; p150; v-abl                                                                   |
| ABL1                     |                        | H396P    | P00519            | c-abl oncogene 1, receptor tyrosine kinase; ABL; ABL1; bcr/abl; c-ABL; JTK7; p150; v-abl                                                                   |

**Table S4.** Selected annotation of LINCS small molecules using LINCS metadata standards and including information about DrugBank indication (for a full list see <http://lifekb.org/index.php/data-standards>).

| LINCS ID | Name             | Alternative Names                        | PubChem CID | SMILES                                                                                                                    | DrugBank Indication                                                                                                                                                                                                                                                                                                                | NCBI MLP Probe ID | NCBI Probe URL                                                                                    | PubChem Library category | Molecular Weight | Molecular Formula | clogP |
|----------|------------------|------------------------------------------|-------------|---------------------------------------------------------------------------------------------------------------------------|------------------------------------------------------------------------------------------------------------------------------------------------------------------------------------------------------------------------------------------------------------------------------------------------------------------------------------|-------------------|---------------------------------------------------------------------------------------------------|--------------------------|------------------|-------------------|-------|
| LSM-1001 | (R)- Roscovitine | (R)- Roscovitine;CVC 202;Seliciclib      | 160355      | <chem>CC(C@H)[C@H](CO)N1C1=NC2=C(C(=N1)NCCC3=CC=CC=C3)N=CN2C(C)C</chem>                                                   |                                                                                                                                                                                                                                                                                                                                    |                   |                                                                                                   |                          | 354.2            | C19H26N6O         | 2.89  |
| LSM-1002 | ALW-ll-38-3      | ALW-ll-38-3                              | 24880028    | <chem>CC1=C(C(=C(C=C1)N(C)=O)C2=CC=CC(=C2)N3C=C(N=C3)C(F)N(C)=O)C4=CC=NO4</chem>                                          |                                                                                                                                                                                                                                                                                                                                    |                   |                                                                                                   |                          | 469.1            | C23H18F3N5O3      | 2.51  |
| LSM-1004 | AT-7519          | AT-7519                                  | 11338033    | <chem>C1CNCCC1NC(=O)C2=C(C(=NN2)N(C)=O)C3=C(C(=CC=C3)C)I</chem>                                                           |                                                                                                                                                                                                                                                                                                                                    |                   |                                                                                                   |                          | 381.1            | C16H17Cl2N5O2     | -0.12 |
| LSM-1005 | AV-951           | AV-951;Tivozanib                         | 9911830     | <chem>CC1=CC(=NO1)N(C(=O)N2C=C(C=C(C=C2)O)C3=C4C=C(C(=CC4=NC=C3)O)O)C1</chem>                                             |                                                                                                                                                                                                                                                                                                                                    |                   |                                                                                                   |                          | 454.1            | C22H19ClN4O5      | 3.57  |
| LSM-1006 | AZD7762          | AZD7762                                  |             | <chem>C1C(C@H)[CNC1]N(C)=O)C2=C(C(=C(C(=C2)C3=CC(=CC=C3)F)N(C)=O)N</chem>                                                 |                                                                                                                                                                                                                                                                                                                                    |                   |                                                                                                   |                          | 362.1            | C17H19FN4O2S      | 2.40  |
| LSM-1007 | AZD8055          | AZD8055                                  | 25262965    | <chem>C(C@H)[C@H](CO)N1C2=NC(=NC3=C2C=CC(=N3)C4=CC(=C(C=C4)O)O)N5CCOC(C@H)5C</chem>                                       |                                                                                                                                                                                                                                                                                                                                    |                   |                                                                                                   |                          | 465.2            | C25H31N5O4        | 3.53  |
| LSM-1008 | BAY-439006       | BAY-439006;Sorafenib                     | 216239      | <chem>CNC(=O)C1=NC=CC(=C1)OC2=CC=C(C(=C2)N(C(=O)N(C3=CC(=C(C=C3)C)C(F)C(F)C)C(=O)N(C3=CC(=C(C=C3)O)O)N5CCOC(C@H)5C</chem> | Antineoplastic;For the treatment of patients with advanced renal cell carcinoma.                                                                                                                                                                                                                                                   |                   |                                                                                                   | MLSMR                    | 464.1            | C21H16ClF3N4O3    | 4.34  |
| LSM-1009 | CP466722         | CP466722                                 | 44551660    | <chem>COC1=C(C=C2C(=C1)C(=NC=N2)N3C(=NC(=N3)C4=CC=CC(=N4)O)C</chem>                                                       |                                                                                                                                                                                                                                                                                                                                    |                   |                                                                                                   |                          | 349.1            | C17H15N7O2        | 2.35  |
| LSM-1011 | Flavopiridol     | Flavopiridol;Alv oxidib;HMR-1275;L868275 | 5287969     | <chem>C=C(C3=C2O(C(=CC3=O)C4=CC=CC=C4)C1O)O</chem>                                                                        |                                                                                                                                                                                                                                                                                                                                    |                   |                                                                                                   |                          | 401.1            | C21H20ClNO5       | 2.46  |
| LSM-1012 | GSK429286A       | GSK429286A                               | 11373846    | <chem>CC1=C(C(C(C(=O)N1)C2=CC=C(C(=C2)C(F)F)F)C(=O)N(C3=C(C=C4(C=C3)C=NN4)F)C(=O)N(C3=CC(=C(C=C4)CN</chem>                |                                                                                                                                                                                                                                                                                                                                    |                   |                                                                                                   |                          | 432.1            | C21H16F4N4O2      | 1.93  |
| LSM-1013 | GSK461364        | GSK461364                                | 15983966    | <chem>C(C@H)(C1=CC=CC=C1C(F)F)OC2=C(S(C(=C2)N3C=NC4=C3C(=C(C=C4)CN5CCN(C)C(=O)N</chem>                                    |                                                                                                                                                                                                                                                                                                                                    |                   |                                                                                                   |                          | 543.2            | C27H28F3N5O2S     | 3.66  |
| LSM-1020 | Dasatinib        | Dasatinib;BMS-354825;Sprycel             | 3062316     | <chem>CC1=C(C(=CC=C1)C)N(C(=O)C2=CN=C(C2)N(C3=NC(=NC(=C3)N4CCN(C)C4)CCO)C</chem>                                          | For the treatment of adults with chronic, accelerated, or myeloid or lymphoid blast phase chronic myeloid leukemia with resistance or intolerance to prior therapy. Also indicated for the treatment of adults with Philadelphia chromosome-positive acute lymphoblastic leukemia with resistance or intolerance to prior therapy. |                   |                                                                                                   | MLSMR                    | 487.2            | C22H26ClN7O2S     | 2.52  |
| LSM-1323 |                  |                                          | 16190867    | <chem>CCCNC1(C(=C(N1)CN2CCCC(C2)C(=O)C3=CC(=CC=C3)OC(C)C</chem>                                                           |                                                                                                                                                                                                                                                                                                                                    | ML157             | <a href="https://pub.ncbi.nlm.nih.gov/pubmed/15151">https://pub.ncbi.nlm.nih.gov/pubmed/15151</a> | MLSMR                    | 383.3            | C23H33N3O2        | 4.02  |

**Table S5.** Annotation of disease sub-type and mutation information of ovarian cancer cell lines used at LINCS.

| Cell line | Disease                             | Gene mutations                          |
|-----------|-------------------------------------|-----------------------------------------|
| SW 626    | ovary adenocarcinoma                | APC; KRAS; SMAD4; TP53                  |
| TOV-21G   | ovarian clear cell adenocarcinoma   | ARID1A; KRAS; PIK3CA; PTEN              |
| OVISE     | ovary adenocarcinoma                | ARID1A; PPP2R1A                         |
| OVTOKO    | ovary adenocarcinoma                | ARID1A; PPP2R1A                         |
| ES-2      | ovarian clear cell adenocarcinoma   | BRAF                                    |
| OV-90     | papillary serous adenocarcinoma     | BRAF                                    |
| KGN       | granulosa cell tumor                | CDKN2A; CDKN2a(p14); FOXL2              |
| SK-OV-3   | ovary adenocarcinoma                | CDKN2A; CDKN2a(p14); MLH1; PIK3CA; TP53 |
| TYK-nu    | ovarian carcinoma                   | CDKN2A; CDKN2a(p14); NRAS; TP53         |
| TOV-112D  | endometrioid ovary carcinoma        | CTNNB1                                  |
| Caov-3    | ovary adenocarcinoma                | FAM123B; PTEN; STK11; TP53              |
| MCAS      | ovarian mucinous cystadenocarcinoma | KRAS; PIK3CA; SMAD4                     |
| OAW28     | ovarian cystadenocarcinoma          | MAP2K4                                  |
| EFO-27    | ovarian mucinous adenocarcinoma     | MSH2; PTEN; TP53                        |
| PA-1      | teratocarcinoma                     | NRAS; RB1                               |
| OAW42     | ovarian cystadenocarcinoma          | PIK3CA                                  |
| A2780     | ovary adenocarcinoma                | PTEN                                    |
| OVCAR-3   | ovary adenocarcinoma                | RB1; PIK3R1; SMARCA4; TP53              |
| KURAMOCHI | ovarian carcinoma                   | TP53                                    |
| EFO-21    | ovarian cystadenocarcinoma          | TP53                                    |
| OC-314    | ovarian cystadenocarcinoma          | TP53                                    |
| OVCAR-4   | ovary adenocarcinoma                | TP53                                    |
| Caov-4    | ovary adenocarcinoma                | TP53; RB1                               |
| RMG-I     | ovarian clear cell adenocarcinoma   |                                         |
| COV644    | ovarian mucinous adenocarcinoma     |                                         |
| A2780ADR  | ovary adenocarcinoma                |                                         |
| A2780cis  | ovary adenocarcinoma                |                                         |
| COLO-704  | ovary adenocarcinoma                |                                         |
| OVKATE    | ovary adenocarcinoma                |                                         |
| OVMIU     | ovary adenocarcinoma                |                                         |
| OVSAYO    | ovary adenocarcinoma                |                                         |
| RKN       | ovary leiomyosarcoma                |                                         |
| OV7       | ovary mixed epithelial carcinoma    |                                         |
| FU-OV-1   | papillary serous adenocarcinoma     |                                         |

## (II) Supporting Figure S1 to S2

```

{
  "assayDescription": "The KINOMEScan assay platform is based on a competition binding ...",
  "assayProtocol": "1. T7 kinase-tagged phage strains are grown in parallel in 24-well or ...",
  "assayProtocolReference": "KINOMEScan website: http://kinomescan.com/Technology ...",
  "assayTitle": "Sorafenib KINOMEScan",
  "bioAssay": "KINOMEScan",

  "datapointFile": {
    "cols": [
      "dataRecordID",
      "hmsDatasetID",
      "smCenterCompoundID",
      "smSalt",
      "smCenterSampleID",
      "smLincsID",
      "smName",
      "cName",
      "cLincsID",
      "cCenterSpecificID",
      "ppName",
      "ppLincsID",
      "recordedPlate",
      "recordedWell",
      "controlType",
      "datapointName",
      "datapointUnit",
      "datapointValue"
    ],
    "datapoints": [
      {
        "cell": null,
        "comments": null,
        "dataType": "Text",
        "datapointName": "screeningConcentrationUnit",
        "datapointUnit": null,
        "description": null,
        "displayName": "Conc unit",
        "precision": null,
        "protein": null,
        "readoutType": null,
        "replicate": null
      },
      {
        "cell": null,
        "comments": null,
        "dataType": "Numeric",
        "datapointName": "screeningConcentration",
        "datapointUnit": null,
        "description": null,
        "displayName": "Assay compound conc",
        "precision": 0,
        "protein": null,
        "readoutType": null,
        "replicate": null
      },
      {
        "cell": null,
        "comments": null,
        "dataType": "Numeric",
        "datapointName": "percentControl",
        "datapointUnit": null,
        "description": null,
        "displayName": "% Control",
        "precision": 1,
        "protein": null,
        "readoutType": "Quantitative PCR",
        "replicate": null
      }
    ]
  },
  "noCols": 18,
  "noDatapoints": 3,
  "uri": "http://lincs.hms.harvard.edu/db/api/v1/datasetdata/20020"
},

  "dateDataReceived": "2011-01-25",
  "dateLoaded": "2011-07-15",
  "datePubliclyAvailable": "2011-07-15",
  "hmsDatasetID": "20020",

  "safVersion": "0.1",

  "screeningFacility": "HMS",
  "screeningLabInvestigator": "Qingsong Liu",
  "screeningPrincipalInvestigator": "Nathanael Gray",
  "usageMessage": null
}

```

**Legend:**

|                                                                                                                      |                                                              |
|----------------------------------------------------------------------------------------------------------------------|--------------------------------------------------------------|
| Color coded boxes to identify the logical sections in a SAF:                                                         | Color coded text to identify SAF fields:                     |
| <span style="border: 1px solid red; display: inline-block; width: 10px; height: 10px;"></span> Header                | <span style="color: blue;">BAO/LIFE Ontology Concepts</span> |
| <span style="border: 1px solid blue; display: inline-block; width: 10px; height: 10px;"></span> BioAssay Description | <span style="color: green;">LINCS Metadata Standards</span>  |
| <span style="border: 1px solid green; display: inline-block; width: 10px; height: 10px;"></span> Data Description    | House Keeping Data Exchange                                  |

**Figure S1.** Illustration of the assay Simple Annotation Format (SAF) to describe assay and result metadata and to facilitate the exchange of this information via web services.

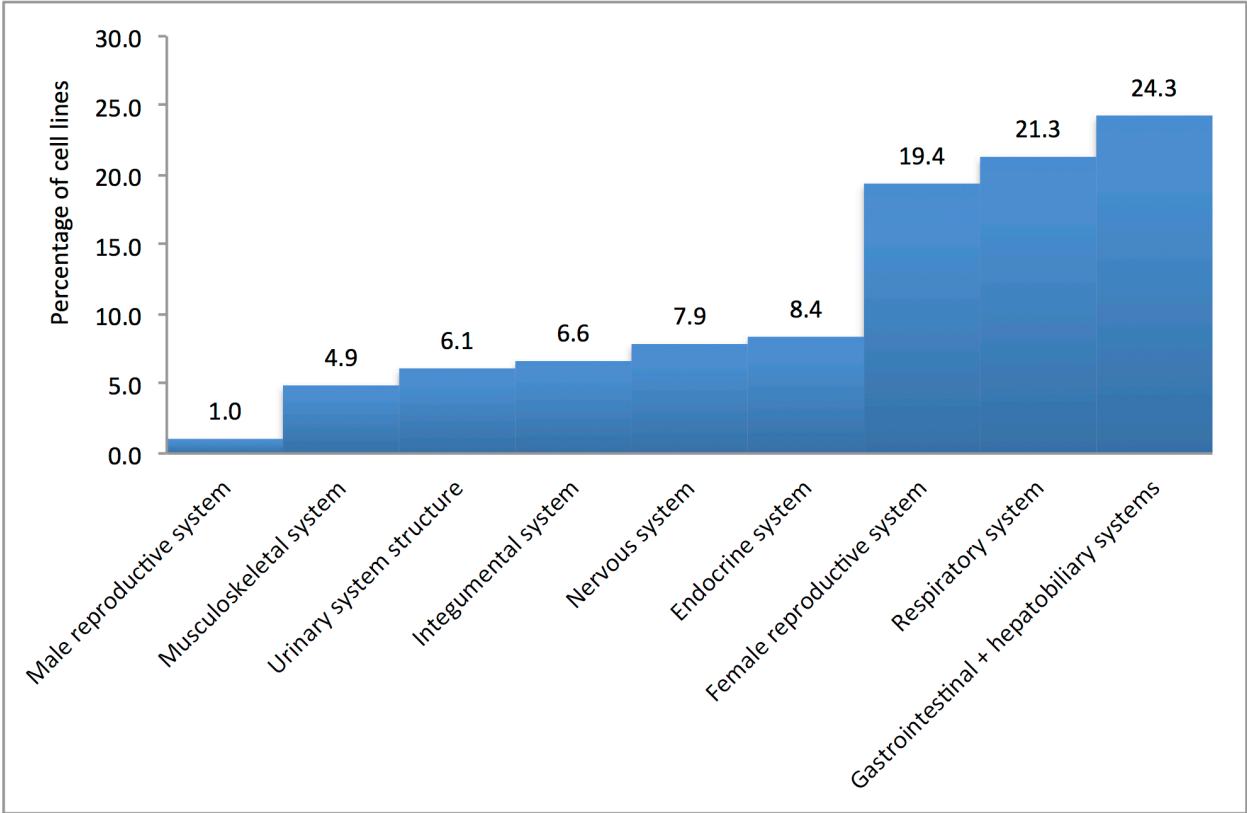

**Figure S2.** Distribution (percentage) of cancer cell lines tested in LINCS assays by their organs of origin.
